# Supplementary material
Source: PubMed Central journal article supplement (PMC5663357)
Supplement: jci-127-96036-s001.pdf [file jci-127-96036-s001.pdf]

Full unedited gel for Figure 1C

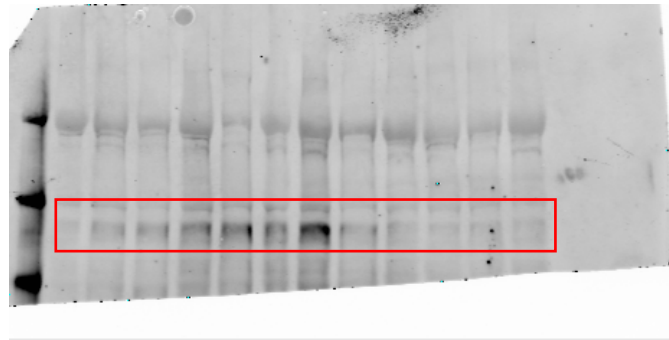

TSC1

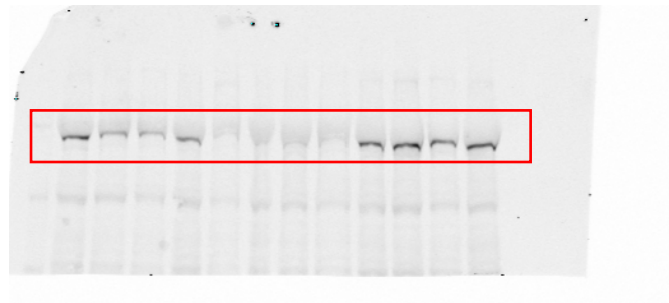

Raptor

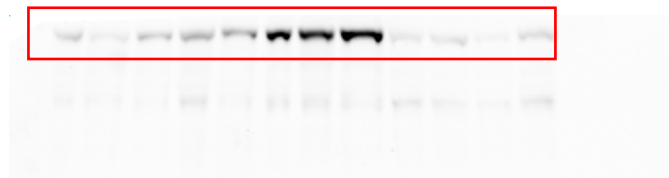

pS473 Akt

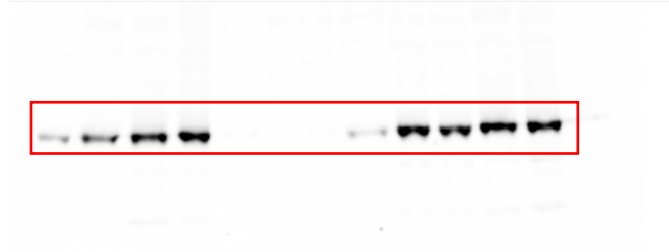

pS6

Full unedited gel for Figure 2B

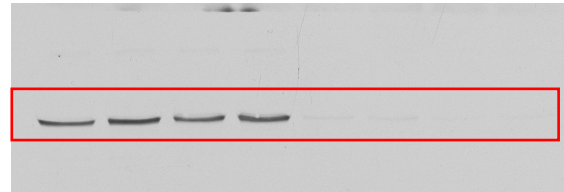

Raptor

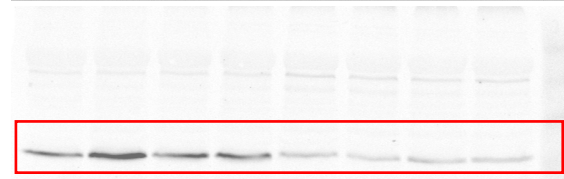

pS473 Akt

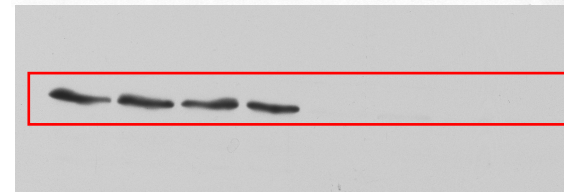

Akt2

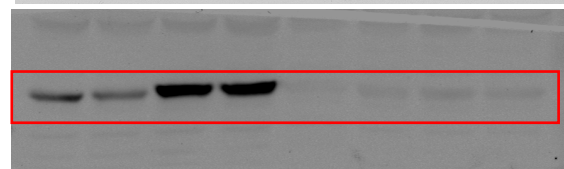

pS6

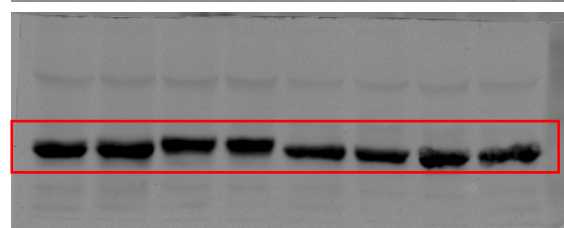

S6

Full unedited gel for Figure 5E

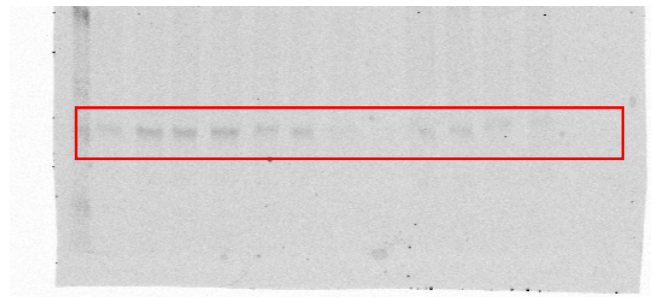

CCT

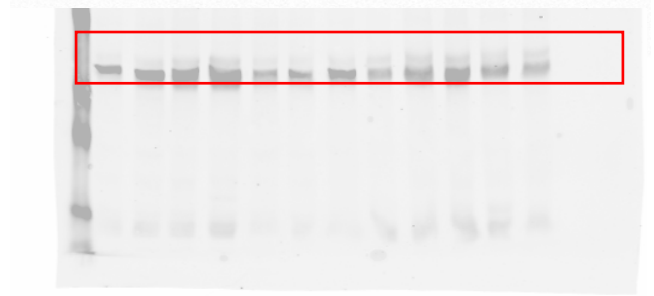

tubulin
